# Supplementary material for: Multi-Objective Optimization for Sustainable Supply Chain and Logistics: A Review
Source: MDPI journal article supplement (doi:10.3390/su132413617), 2021-12-09
Supplement: s1 [file s1]

## Supplementary materials

### List of references of analysed articles

| Number | Reference Number | Reference                                                                                                                                                                                                                                                                                                                                                                                                                      |
|--------|------------------|--------------------------------------------------------------------------------------------------------------------------------------------------------------------------------------------------------------------------------------------------------------------------------------------------------------------------------------------------------------------------------------------------------------------------------|
| 1      | 5                | Darestani, S. A., & Hemmati, M. (2019). Robust optimization of a bi-objective closed-loop supply chain network for perishable goods considering queue system. <i>Computers &amp; Industrial Engineering</i> , 136, 277–292. <a href="https://doi.org/10.1016/j.cie.2019.07.018">https://doi.org/10.1016/j.cie.2019.07.018</a>                                                                                                  |
| 2      | 6                | Mota, B., Gomes, M. I., Carvalho, A., & Barbosa-Povoa, A. P. (2015). Towards supply chain sustainability: economic, environmental and social design and planning. <i>Journal of Cleaner Production</i> , 105, 14–27. <a href="https://doi.org/10.1016/j.jclepro.2014.07.052">https://doi.org/10.1016/j.jclepro.2014.07.052</a>                                                                                                 |
| 3      | 9                | Nasr, K. A., Tavana, M., Alavi, B., & Mina, H. (2020). A novel fuzzy multi-objective circular supplier selection and order allocation model for sustainable closed-loop supply chains. <i>Journal of Cleaner Production</i> , 124994. <a href="https://doi.org/10.1016/j.jclepro.2020.124994">https://doi.org/10.1016/j.jclepro.2020.124994</a>                                                                                |
| 4      | 10               | Resat, H. G., & Unsal, B. (2019). A novel multi-objective optimization approach for sustainable supply chain: A case study in packaging industry. <i>Sustainable Production and Consumption</i> , 20, 29–39. <a href="https://doi.org/10.1016/j.spc.2019.04.008">https://doi.org/10.1016/j.spc.2019.04.008</a>                                                                                                                 |
| 5      | 14               | Chen, L., Zhao, X., Tang, O., Price, L., Zhang, S., & Zhu, W. (2017). Supply chain collaboration for sustainability: A literature review and future research agenda. <i>International Journal of Production Economics</i> , 194, 73–87. <a href="https://doi.org/10.1016/j.ijpe.2017.04.005">https://doi.org/10.1016/j.ijpe.2017.04.005</a>                                                                                    |
| 6      | 39               | Farrokhi-Asl, H., Makui, A., Ghousi, R., & Rabbani, M. (2020). Developing a hazardous waste management system with consideration of health, safety, and environment. <i>Computers &amp; Electrical Engineering</i> , 82, 106553. <a href="https://doi.org/10.1016/j.compeleceng.2020.106553">https://doi.org/10.1016/j.compeleceng.2020.106553</a>                                                                             |
| 7      | 40               | Sharifi, M., Hosseini-Motlagh, S.-M., Samani, M. R. G., & Kalhor, T. (2020). Novel resilient-sustainable strategies for second-generation biofuel network design considering Neem and Eruca Sativa under hybrid stochastic fuzzy robust approach. <i>Computers &amp; Chemical Engineering</i> , 143, 107073. <a href="https://doi.org/10.1016/j.compchemeng.2020.107073">https://doi.org/10.1016/j.compchemeng.2020.107073</a> |

- 8      41      Varsei, M., & Polyakovskiy, S. (2017). Sustainable supply chain network design: A case of the wine industry in Australia. *Omega*, 66, 236–247. <https://doi.org/10.1016/j.omega.2015.11.009>
- 9      42      Abdolazimi, O., Salehi Esfandarani, M., Salehi, M., & Shishebori, D. (2020). Robust design of a multi-objective closed-loop supply chain by integrating on-time delivery, cost, and environmental aspects, case study of a Tire Factory. *Journal of Cleaner Production*, 264, 121566. <https://doi.org/10.1016/j.jclepro.2020.121566>
- 10      43      Allaoui, H., Guo, Y., Choudhary, A., & Bloemhof, J. (2018). Sustainable agro-food supply chain design using two-stage hybrid multi-objective decision-making approach. *Computers and Operations Research*, 89, 369–384. <https://doi.org/10.1016/j.cor.2016.10.012>
- 11      44      Rout, C., Paul, A., Kumar, R. S., Chakraborty, D., & Goswami, A. (2020). Cooperative sustainable supply chain for deteriorating item and imperfect production under different carbon emission regulations. *Journal of Cleaner Production*, 272, 122170. <https://doi.org/10.1016/j.jclepro.2020.122170>
- 12      45      Tiammee, S., & Likasiri, C. (2020). Sustainability in corn production management: A multi-objective approach. *Journal of Cleaner Production*, 257, 120855. <https://doi.org/10.1016/j.jclepro.2020.120855>
- 13      46      Zheng, M., Li, W., Liu, Y., & Liu, X. (2020). A Lagrangian heuristic algorithm for sustainable supply chain network considering CO2 emission. *Journal of Cleaner Production*, 270, 122409. <https://doi.org/10.1016/j.jclepro.2020.122409>
- 14      47      Sarkar, B., Omaid, M., & Choi, S.-B. (2018). A Multi-Objective Optimization of Energy, Economic, and Carbon Emission in a Production Model under Sustainable Supply Chain Management. *NATO Advanced Science Institutes Series E: Applied Sciences*, 8(10), 1744. <https://doi.org/10.3390/app8101744>
- 15      48      Chen, Z., & Andresen, S. (2014). A Multi-objective Optimization Model of Production-Sourcing for Sustainable Supply Chain with Consideration of Social, Environmental, and Economic Factors. *Mathematical Problems in Engineering*, 2014 <https://doi.org/10.1155/2014/616107>

- Govindan, K., Jafarian, A., & Nourbakhsh, V. (2019). Designing a sustainable supply chain network integrated with vehicle routing: A comparison of hybrid swarm intelligence metaheuristics. Computers & Operations Research, 110, 220–235. <https://doi.org/10.1016/j.cor.2018.11.013>
- Wang, Y., Shi, Q., Hu, Q., You, Z., Bai, Y., & Guo, C. (2020). An efficiency sorting multi-objective optimization framework for sustainable supply network optimization and decision making. Journal of Cleaner Production, 272, 122842. <https://doi.org/10.1016/j.jclepro.2020.122842>
- Mohebalizadehgashti, F., Zolfagharinia, H., & Amin, S. H. (2020). Designing a green meat supply chain network: A multi-objective approach. International Journal of Production Economics, 219, 312–327. <https://doi.org/10.1016/j.ijpe.2019.07.007>
- Mohebalizadehgashti, F., Zolfagharinia, H., & Amin, S. H. (2020). Designing a green meat supply chain network: A multi-objective approach. International Journal of Production Economics, 219, 312–327. <https://doi.org/10.1016/j.ijpe.2019.07.007>
- Azadeh, A., Shafiee, F., Yazdanparast, R., Heydari, J., & Fathabad, A. M. (2017). Evolutionary multi-objective optimization of environmental indicators of integrated crude oil supply chain under uncertainty. Journal of Cleaner Production, 152, 295–311. <https://doi.org/10.1016/j.jclepro.2017.03.105>
- Arampantzi, C., & Minis, I. (2017). A new model for designing sustainable supply chain networks and its application to a global manufacturer. Journal of Cleaner Production, 156, 276–292. <https://doi.org/10.1016/j.jclepro.2017.03.16453>.
- Saffar, M., Razmi, J., & Others. (2015). A new multi objective optimization model for designing a green supply chain network under uncertainty. International Journal of Industrial Engineering Computations. 6(1), 15–32. <https://doi.org/10.5267/j.ijiec.2014.10.001>
- Govindan, K., Darbari, J. D., Agarwal, V., & Jha, P. C. (2017). Fuzzy multi-objective approach for optimal selection of suppliers and transportation decisions in an eco-efficient closed loop supply chain network. Journal of Cleaner Production, 165, 1598–1619. <https://doi.org/10.1016/j.jclepro.2017.06.180>

|    |    |                                                                                                                                                                                                                                                                                                                                                          |
|----|----|----------------------------------------------------------------------------------------------------------------------------------------------------------------------------------------------------------------------------------------------------------------------------------------------------------------------------------------------------------|
| 24 | 57 | Jamshidi, R., Fatemi Ghomi, S. M. T., & Karimi, B. (2012). Multi-objective green supply chain optimization with a new hybrid memetic algorithm using the Taguchi method. <i>Scientia Iranica</i> , 19(6), 1876–1886. <a href="https://doi.org/10.1016/j.scient.2012.07.002">https://doi.org/10.1016/j.scient.2012.07.002</a>                             |
| 25 | 58 | Rasmi, S. A. B., Kazan, C., & Türkay, M. (2019). A multi-criteria decision analysis to include environmental, social, and cultural issues in the sustainable aggregate production plans. <i>Computers &amp; Industrial Engineering</i> , 132, 348–360. <a href="https://doi.org/10.1016/j.cie.2019.04.036">https://doi.org/10.1016/j.cie.2019.04.036</a> |
| 26 | 59 | Nujoom, R., Mohammed, A., & Wang, Q. (2019). Drafting a cost-effective approach towards a sustainable manufacturing system design. <i>Computers &amp; Industrial Engineering</i> , 133, 317–330. <a href="https://doi.org/10.1016/j.cie.2019.05.007">https://doi.org/10.1016/j.cie.2019.05.007</a>                                                       |
| 27 | 60 | Motevalli-Taher, F., Paydar, M. M., & Emami, S. (2020). Wheat sustainable supply chain network design with forecasted demand by simulation. <i>Computers and Electronic Agriculture</i> , 178, 105763. <a href="https://doi.org/10.1016/j.compag.2020.105763">https://doi.org/10.1016/j.compag.2020.105763</a>                                           |
| 28 | 61 | Ozgen, D., & Gulsun, B. (2014). Combining possibilistic linear programming and fuzzy AHP for solving the multi-objective capacitated multi-facility location problem. <i>Information Sciences</i> , 268, 185–201. DOI: 10.1016/j.ins.2014.01.024                                                                                                         |
| 29 | 62 | Budak, A. (2020). Sustainable reverse logistics optimization with triple bottom line approach: An integration of disassembly line balancing. <i>Journal of Cleaner Production</i> , 270, 122475. <a href="https://doi.org/10.1016/j.jclepro.2020.122475">https://doi.org/10.1016/j.jclepro.2020.122475</a>                                               |
| 30 | 63 | Dutta, P., Mishra, A., Khandelwal, S., & Katthawala, I. (2020). A multiobjective optimization model for sustainable reverse logistics in Indian E-commerce market. <i>Journal of Cleaner Production</i> , 249, 119348. <a href="https://doi.org/10.1016/j.jclepro.2019.119348">https://doi.org/10.1016/j.jclepro.2019.119348</a>                         |
| 31 | 64 | Gao, X., & Cao, C. (2020). A novel multi-objective scenario-based optimization model for sustainable reverse logistics supply chain network redesign considering facility reconstruction. <i>Journal of Cleaner Production</i> , 270, 122405. <a href="https://doi.org/10.1016/j.jclepro.2020.122405">https://doi.org/10.1016/j.jclepro.2020.122405</a>  |
| 32 | 65 | Huang, L., Zhen, L., & Yin, L. (2020). Waste material recycling and exchanging decisions for industrial symbiosis network optimization. <i>J. Cleaner Prod.</i> , 276, 124073. <a href="https://doi.org/10.1016/j.jclepro.2020.124073">https://doi.org/10.1016/j.jclepro.2020.124073</a>                                                                 |

- 33      66      Pourmehdi, M., Paydar, M. M., & Asadi-Gangraj, E. (2020). Scenario-based design of a steel sustainable closed-loop supply chain network considering production technology. *Journal of Cleaner Production*, 277, 123298. <https://doi.org/10.1016/j.jclepro.2020.123298>.
- 34      67      Rabbani, M., Heidari, R., Farrokhi-Asl, H., & Rahimi, N. (2018)b. Using metaheuristic algorithms to solve a multi-objective industrial hazardous waste location-routing problem considering incompatible waste types. *Journal of Cleaner Production*, 170, 227–241. <https://doi.org/10.1016/j.jclepro.2017.09.029>
- 35      68      Govindan, K., Paam, P., & Abtahi, A.-R. (2016). A fuzzy multi-objective optimization model for sustainable reverse logistics network design. *Ecological Indicators*, 67, 753–768. <https://doi.org/10.1016/j.ecolind.2016.03.017>
- 36      69      Abdallah, M., Hamdan, S., & Shabib, A. (2020). A multi-objective optimization model for strategic waste management master plans. *Journal of Cleaner Production*, 124714. <https://doi.org/10.1016/j.jclepro.2020.124714>
- 37      70      Mohamed Sultan, A. A., & Mativenga, P. T. (2019). Sustainable Location Identification Decision Protocol (SuLIDeP) for determining the location of recycling centres in a circular economy. *Journal of Cleaner Production*, 223, 508–521. <https://doi.org/10.1016/j.jclepro.2019.03.104>
- 38      71      Yu, H., & Solvang, W. D. (2018). Incorporating flexible capacity in the planning of a multi-product multi-echelon sustainable reverse logistics network under uncertainty. *Journal of Cleaner Production*, 198, 285–303. <https://doi.org/10.1016/j.jclepro.2018.07.019>
- 39      72      Vivas, R. de C., Sant'Anna, A. M. O., Esquerre, K. P. S. O., & Freires, F. G. M. (2020). Integrated method combining analytical and mathematical models for the evaluation and optimization of sustainable supply chains: A Brazilian case study. *Computers & Industrial Engineering*, 139, 105670. <https://doi.org/10.1016/j.cie.2019.01.044>
- 40      73      Pourjavad, E., & Mayorga, R. V. (2019). Multi-objective Fuzzy Programming of Closed-Loop Supply Chain Considering Sustainable Measures. *International Journal of Fuzzy Systems*, 21(2), 655–673. <http://dx.doi.org/10.1007/s40815-018-0551-y>

|    |    |                                                                                                                                                                                                     |
|----|----|-----------------------------------------------------------------------------------------------------------------------------------------------------------------------------------------------------|
|    |    | Mohammed, A., Harris, I., Soroka, A., & Nujoom, R. (2019). A hybrid MCDM-fuzzy multi-objective programming approach for a G-resilient supply chain network design.                                  |
| 41 | 74 | Computers & Industrial Engineering, 127, 297–312. <a href="https://doi.org/10.1016/j.cie.2018.09.052">https://doi.org/10.1016/j.cie.2018.09.052</a>                                                 |
|    |    | Mohammed, A., Setchi, R., Filip, M., Harris, I., & Li, X. (2018). An integrated methodology for a sustainable two-stage supplier selection and order allocation problem.                            |
| 42 | 75 | Journal of Cleaner Production, 192, 99–114. <a href="https://doi.org/10.1016/j.jclepro.2018.04.131">https://doi.org/10.1016/j.jclepro.2018.04.131</a>                                               |
|    |    | Rahimi, M., Ghezavati, V., & Asadi, F. (2019). A stochastic risk-averse sustainable supply chain network design problem with quantity discount considering multiple sources of uncertainty.         |
| 43 | 76 | Computers & Industrial Engineering, 130, 430–449. <a href="https://doi.org/10.1016/j.cie.2019.02.037">https://doi.org/10.1016/j.cie.2019.02.037</a>                                                 |
|    |    | Ebrahimi, S. B. (2018). A stochastic multi-objective location-allocation-routing problem for tire supply chain considering sustainability aspects and quantity discounts.                           |
| 44 | 77 | Journal of Cleaner Production, 198, 704–720. <a href="https://doi.org/10.1016/j.jclepro.2018.07.059">https://doi.org/10.1016/j.jclepro.2018.07.059</a>                                              |
|    |    | Ruiz-Femenia, R., Guillén-Gosálbez, G., Jiménez, L., & Caballero, J. A. (2013). Multi-objective optimization of environmentally conscious chemical supply chains under demand uncertainty.          |
| 45 | 78 | Chemical Engineering Science, 95, 1–11. <a href="https://doi.org/10.1016/j.ces.2013.02.054">https://doi.org/10.1016/j.ces.2013.02.054</a>                                                           |
|    |    | Wang, L.-C., Chen, T.-L., Chen, Y.-Y., Chen, Y.-W., & Wang, A. (2013). Closed-Loop Sustainable Supply Chain Design Under Uncertainties.                                                             |
| 46 | 79 | Advances in Sustainable and Competitive Manufacturing Systems, 799–812. <a href="https://doi.org/10.1007/978-3-319-00557-7_66">https://doi.org/10.1007/978-3-319-00557-7_66</a>                     |
|    |    | Rabbani, M., Hosseini-Mokhallesun, S. A. A., Ordibazar, A. H., & Farrokhi-Asl, H. (2020). A hybrid robust possibilistic approach for a sustainable supply chain location-allocation network design. |
| 47 | 80 | International Journal of Systems Science: Operations & Logistics, 7(1), 60–75.<br><a href="https://doi.org/10.1080/23302674.2018.1506061">https://doi.org/10.1080/23302674.2018.1506061</a>         |
|    |    | Biuki, M., Kazemi, A., & Alinezhad, A. (2020). An integrated location-routing-inventory model for sustainable design of a perishable products supply chain network.                                 |
| 48 | 87 | Journal of Cleaner Production, 260, 120842. <a href="https://doi.org/10.1016/j.jclepro.2020.120842">https://doi.org/10.1016/j.jclepro.2020.120842</a>                                               |

|    |    |                                                                                                                                                                                                                                                                                                                                                                                                                                 |
|----|----|---------------------------------------------------------------------------------------------------------------------------------------------------------------------------------------------------------------------------------------------------------------------------------------------------------------------------------------------------------------------------------------------------------------------------------|
| 49 | 88 | Silva, W. H., Guarnieri, P., Carvalho, J. M., Farias, J. S., & Reis, S. A. dos. (2019). Sustainable Supply Chain Management: Analyzing the Past to Determine a Research Agenda. <i>Logistics</i> , 3(2), 14. <a href="https://doi.org/10.3390/logistics3020014">https://doi.org/10.3390/logistics3020014</a>                                                                                                                    |
|    |    | Ahmed, W., & Sarkar, B. (2019). Management of next-generation energy using a triple bottom line approach under a supply chain framework. <i>Resour. Conserv. Recycl.</i> , 150, 104431. <a href="https://doi.org/10.1016/j.resconrec.2019.104431">https://doi.org/10.1016/j.resconrec.2019.104431</a>                                                                                                                           |
| 50 | 93 | Balaman, Ş. Y. (2016). Investment planning and strategic management of sustainable systems for clean power generation: An $\epsilon$ -constraint based multi objective modeling approach. <i>Journal of Cleaner Production</i> , 137, 1179–1190. <a href="https://doi.org/10.1016/j.jclepro.2016.07.202">https://doi.org/10.1016/j.jclepro.2016.07.202</a>                                                                      |
| 51 | 94 | Banasik, A., Kanellopoulos, A., Claassen, G. D. H., Bloemhof-Ruwaard, J. M., & van der Vorst, J. G. A. J. (2017). Closing loops in agricultural supply chains using multi-objective optimization: A case study of an industrial mushroom supply chain. <i>International Journal of Production Economics</i> , 183, 409–420. <a href="https://doi.org/10.1016/j.ijpe.2016.08.012">https://doi.org/10.1016/j.ijpe.2016.08.012</a> |
| 52 | 95 | Bortolini, M., Faccio, M., Ferrari, E., Gamberi, M., & Pilati, F. (2016). Fresh food sustainable distribution: cost, delivery time and carbon footprint three-objective optimization. <i>Journal of Food Engineering</i> , 174, 56–67. <a href="https://doi.org/10.1016/j.jfoodeng.2015.11.014">https://doi.org/10.1016/j.jfoodeng.2015.11.014</a>                                                                              |
| 53 | 96 | Devika, K., Jafarian, A., & Nourbakhsh, V. (2014). Designing a sustainable closed-loop supply chain network based on triple bottom line approach: A comparison of metaheuristics hybridization techniques. <i>European Journal of Operational Research</i> , 235(3), 594–615. <a href="https://doi.org/10.1016/j.ejor.2013.12.032">https://doi.org/10.1016/j.ejor.2013.12.032</a>                                               |
| 54 | 97 | Eskandarpour, M., Dejax, P., & Péton, O. (2019). Multi-directional local search for sustainable supply chain network design. <i>International Journal of Production Research</i> 1–17. <a href="https://doi.org/10.1080/00207543.2019.1696488">https://doi.org/10.1080/00207543.2019.1696488</a>                                                                                                                                |
| 55 | 98 | Govindan, K., Jafarian, A., & Nourbakhsh, V. (2015). Bi-objective integrating sustainable order allocation and sustainable supply chain network strategic design with stochastic demand using a novel robust hybrid multi-objective metaheuristic. <i>Comput. Operat. Res.</i> , 62, 112–130. <a href="https://doi.org/10.1016/j.cor.2014.12.014">https://doi.org/10.1016/j.cor.2014.12.014</a>                                 |
| 56 | 99 |                                                                                                                                                                                                                                                                                                                                                                                                                                 |

- 57      100      Govindan, K., Jafarian, A., Khodaverdi, R., & Devika, K. (2014). Two-echelon multiple-vehicle location–routing problem with time windows for optimization of sustainable supply chain network of perishable food. *International Journal of Production Economics*, 152, 9–28. <https://doi.org/10.1016/j.ijpe.2013.12.028>
- 58      101      Jabbarzadeh, A., Fahimnia, B., & Sabouhi, F. (2018). Resilient and sustainable supply chain design: sustainability analysis under disruption risks. *International Journal of Production Research*, 56(17), 5945–5968. <https://doi.org/10.1080/00207543.2018.1461950>
- 59      102      Kadambala, D. K., Subramanian, N., Tiwari, M. K., Abdulrahman, M., & Liu, C. (2017). Closed loop supply chain networks: Designs for energy and time value efficiency. *International Journal of Production Economics*, 183, 382–393. <https://doi.org/10.1016/j.ijpe.2016.02.004>
- 60      103      Kostin, A., Guillén-Gosálbez, G., & Jiménez, L. (2015). Dimensionality reduction applied to the simultaneous optimization of the economic and life cycle environmental performance of supply chains. *International Journal of Production Economics*, 159, 223–232. <https://doi.org/10.1016/j.ijpe.2014.09.018>
- 61      104      Kumar, D., Rahman, Z., & Chan, F. T. S. (2017). A fuzzy AHP and fuzzy multi-objective linear programming model for order allocation in a sustainable supply chain: A case study. *International Journal of Computer Integrated Manufacturing*, 30(6), 535–551. <https://doi.org/10.1080/0951192X.2016.1145813>
- 62      105      Li, Y., Soleimani, H., & Zohal, M. (2019). An improved ant colony optimization algorithm for the multi-depot green vehicle routing problem with multiple objectives. *Journal of Cleaner Production*, 227, 1161–1172. <https://doi.org/10.1016/j.jclepro.2019.03.185>
- 63      106      Lin, C., Choy, K. L., Ho, G. T. S., & Ng, T. W. (2014). A Genetic Algorithm-based optimization model for supporting green transportation operations. *Expert Systems with Application*, 41(7), 3284–3296. <https://doi.org/10.1016/j.eswa.2013.11.032>
- 64      107      Liotta, G., Stecca, G., & Kaihara, T. (2015). Optimization of freight flows and sourcing in sustainable production and transportation networks. *International Journal of Production Economics*, 164, 351–365. <https://doi.org/10.1016/j.ijpe.2014.12.016>



- 65      108      Liu, Z., Qiu, T., & Chen, B. (2014). A study of the LCA based biofuel supply chain multi-objective optimization model with multi-conversion paths in China. *Applied Energy*, 126, 221–234. <https://doi.org/10.1016/j.apenergy.2014.04.001>
- 66      109      Mahjoub, N., & Sahebi, H. (2020). The water-energy nexus at the hybrid bioenergy supply chain: A sustainable network design model. *Ecological Indicators*, 119, 106799. <https://doi.org/10.1016/j.ecolind.2020.106799>
- 67      110      Martins, C. L., Melo, M. T., & Pato, M. V. (2019). Redesigning a food bank supply chain network in a triple bottom line context. *International Journal of Production Economics*, 214, 234–247. <https://doi.org/10.1016/j.ijpe.2018.11.011>
- 68      111      Mohebalizadeh, M., & Hafezalkotob, A. (2018). Modeling sustainable supply chain management problem with fuzzy demand based on multi-criteria decision-making methods. *International Journal of Industrial and Systems Engineering*, 30(3), 267–297. <https://doi.org/10.1504/IJISE.2018.095527>
- 69      112      Musavi, M., & Bozorgi-Amiri, A. (2017). A multi-objective sustainable hub location-scheduling problem for perishable food supply chain. *Computers & Industrial Engineering*, 113, 766–778. <https://doi.org/10.1016/j.cie.2017.07.039>
- 70      113      Park, K., Okudan Kremer, G. E., & Ma, J. (2018). A regional information-based multi-attribute and multi-objective decision-making approach for sustainable supplier selection and order allocation. *Journal of Cleaner Production*, 187, 590–604. <https://doi.org/10.1016/j.jclepro.2018.03.035>
- 71      114      Pourjavad, E., & Mayorga, R. V. (2018). Optimization of a sustainable closed loop supply chain network design under uncertainty using multi-objective evolutionary algorithms. *Advances in Production Engineering & Management*, 13(2), 216–228. <https://doi.org/10.14743/apem2018.2.286>
- 72      115      Rabbani, M., Saravi, N. A., Farrokhi-Asl, H., Lim, S. F. W. T., & Tahaei, Z. (2018)a. Developing a sustainable supply chain optimization model for switchgrass-based bioenergy production: A case study. *Journal of Cleaner Production*, 200, 827–843. <https://doi.org/10.1016/j.jclepro.2018.07.226>

|    |     |                                                                                                                                                                                                                                                                                                                                                               |
|----|-----|---------------------------------------------------------------------------------------------------------------------------------------------------------------------------------------------------------------------------------------------------------------------------------------------------------------------------------------------------------------|
| 73 | 116 | Resat, H. G., & Turkay, M. (2019). A discrete-continuous optimization approach for the design and operation of synchromodal transportation networks. Computers & Industrial Engineering, 130, 512–525. <a href="https://doi.org/10.1016/j.cie.2019.03.005">https://doi.org/10.1016/j.cie.2019.03.005</a>                                                      |
| 74 | 117 | Reza, E. R., & Sohanian, M. (2020). A multi-objective optimization model for sustainable supply chain network with using genetic algorithm. Journal of Modelling in Management. <a href="https://doi.org/10.1108/JM2-06-2020-0150">https://doi.org/10.1108/JM2-06-2020-0150</a>                                                                               |
| 75 | 118 | Rohmer, S. U. K., Gerdessen, J. C., & Claassen, G. D. H. (2019). Sustainable supply chain design in the food system with dietary considerations: A multi-objective analysis. European Journal of Operational Research, 273(3), 1149–1164. <a href="https://doi.org/10.1016/j.ejor.2018.09.006">https://doi.org/10.1016/j.ejor.2018.09.006</a>                 |
| 76 | 119 | Sahebjamnia, N., Fathollahi-Fard, A. M., & Hajiaghaei-Keshteli, M. (2018). Sustainable tire closed-loop supply chain network design: Hybrid metaheuristic algorithms for large-scale networks. Journal of Cleaner Production, 196, 273–296. <a href="https://doi.org/10.1016/j.jclepro.2018.05.245">https://doi.org/10.1016/j.jclepro.2018.05.245</a>         |
| 77 | 120 | Samadi, A., Mehranfar, N., Fathollahi Fard, A. M., & Hajiaghaei-Keshteli, M. (2018). Heuristic-based metaheuristics to address a sustainable supply chain network design problem. Journal of Industrial and Production Engineering, 35(2), 102–117. <a href="https://doi.org/10.1080/21681015.2017.1422039">https://doi.org/10.1080/21681015.2017.1422039</a> |
| 78 | 121 | Sepehri, M., & Sazvar, Z. (2016). Multi-objective sustainable supply chain with deteriorating products and transportation options under uncertain demand and backorder. Scientia Iranica, 23(6), 2977–2994. <a href="https://doi.org/10.24200/SCI.2016.4006">https://doi.org/10.24200/SCI.2016.4006</a>                                                       |
| 79 | 122 | Souza, V. D., Bloemhof-Ruwaard, J., & Borsato, M. (2019). Exploring ecosystem network analysis to balance resilience and performance in sustainable supply chain design. International Journal of Advanced Operations Management, 11(1-2), 26–45. <a href="https://doi.org/10.1504/IJAOM.2019.098525">https://doi.org/10.1504/IJAOM.2019.098525</a>           |
| 80 | 123 | Taheri-Moghadam, A., Razmi, J., & Baki, M. F. (2019). Designing and planning a sustainable supply chain network considering economic aspects, environmental impact, fixed job opportunities and customer service level. International Journal of Process Management and Benchmarking, 9(1), 73–100                                                            |

- 81      124      Tautenhain, C. P. S., Barbosa-Povoa, A. P., & Nascimento, M. C. V. (2019). A multi-objective matheuristic for designing and planning sustainable supply chains. *Computers & Industrial Engineering*, 135, 1203–1223. <https://doi.org/10.1016/j.cie.2018.12.062>
- 82      125      Tirkolaee, E. B., Goli, A., Faridnia, A., Soltani, M., & Weber, G.-W. (2020). Multi-objective optimization for the reliable pollution-routing problem with cross-dock selection using Pareto-based algorithms. *Journal of Cleaner Production*, 276, 122927. <https://doi.org/10.1016/j.jclepro.2020.122927>
- 83      126      Tsao, Y.-C., Thanh, V.-V., Lu, J.-C., & Yu, V. (2018). Designing sustainable supply chain networks under uncertain environments: Fuzzy multi-objective programming. *Journal of Cleaner Production*, 174, 1550–1565. <https://doi.org/10.1016/j.jclepro.2017.10.272>
- 84      127      Vafaeenezhad, T., Tavakkoli-Moghaddam, R., & Cheikhrouhou, N. (2019). Multi-objective mathematical modeling for sustainable supply chain management in the paper industry. *Computers & Industrial Engineering*, 135, 1092–1102. <https://doi.org/10.1016/j.cie.2019.05.027>
- 85      128      Validi, S., Bhattacharya, A., & Byrne, P. J. (2018). Sustainable distribution system design: a two-phase DoE-guided meta-heuristic solution approach for a three-echelon bi-objective AHP-integrated location-routing model. *Annals of Operations Research*, 290, 191–222. <https://doi.org/10.1007/s10479-018-2887-y>
- 86      129      Validi, S., Bhattacharya, A., & Byrne, P. J. (2014). A case analysis of a sustainable food supply chain distribution system—A multi-objective approach. *International Journal of Production Economics*, 152, 71–87. <https://doi.org/10.1016/j.ijpe.2014.02.003>
- 87      130      Wang, F., Lai, X., & Shi, N. (2011). A multi-objective optimization for green supply chain network design. *Decisions Support Systems*, 51(2), 262–269. <https://doi.org/10.1016/j.dss.2010.11.020>
- 88      131      Xifeng, T., Ji, Z., & Peng, X. (2013). A multi-objective optimization model for sustainable logistics facility location. *Transportation Research Part D: Transport & Environment*, 22, 45–48. <https://doi.org/10.1016/j.trd.2013.03.003>
- 89      132      Yeh, W.-C., & Chuang, M.-C. (2011). Using multi-objective genetic algorithm for partner selection in green supply chain problems. *Expert Systems with Application*, 38(4), 4244–4253. <https://doi.org/10.1016/j.eswa.2010.09.091>

- 90      133      You, F., Tao, L., Graziano, D. J., & Snyder, S. W. (2012). Optimal design of sustainable cellulosic biofuel supply chains: multi-objective optimization coupled with life cycle assessment and input–output analysis. *AIChE Journal*, 58(4), 1157–1180. <https://doi.org/10.1002/aic.12637>
- 91      134      Zarei, J., Amin-Naseri, M. R., Fakehi Khorasani, A. H., & Kashan, A. H. (2020). A sustainable multi-objective framework for designing and planning the supply chain of natural gas components. *Journal of Cleaner Production*, 259, 120649. <https://doi.org/10.1016/j.jclepro.2020.120649>
- 92      135      Zhalechian, M., Tavakkoli-Moghaddam, R., Rahimi, Y., & Jolai, F. (2017). An interactive possibilistic programming approach for a multi-objective hub location problem: Economic and environmental design. *Applied Soft Computing*, 52, 699–713. <https://doi.org/10.1016/j.asoc.2016.10.002>
- 93      136      Zhalechian, M., Tavakkoli-Moghaddam, R., Zahiri, B., & Mohammadi, M. (2016). Sustainable design of a closed-loop location-routing-inventory supply chain network under mixed uncertainty. *Transportation Research Part E: Logistics and Transportation Review*, 89, 182–214. <https://doi.org/10.1016/j.tre.2016.02.011>
- 94      137      Zhang, S., Lee, C. K. M., Wu, K., & Choy, K. L. (2016). Multi-objective optimization for sustainable supply chain network design considering multiple distribution channels. *Expert Systems with Application*, 65, 87–99. <https://doi.org/10.1016/j.eswa.2016.08.037>
- 95      138      Zhang, Q., Shah, N., Wassick, J., Helling, R., & van Egerschot, P. (2014). Sustainable supply chain optimisation: An industrial case study. *Computers & Industrial Engineering* 74, 68–83. <https://doi.org/10.1016/j.cie.2014.05.002>
-
